# Supplementary material for: A Novel Age-Related Circular RNA Circ-ATXN2 Inhibits Proliferation, Promotes Cell Death and Adipogenesis in Rat Adipose Tissue-Derived Stromal Cells
Source: Frontiers journal article supplement (doi:10.3389/fgene.2021.761926), 2021-11-09
Supplement: Data_Sheet_1.ZIP [file Data_Sheet_1.ZIP]

## Sheet: figure 5A
young	old
0.621288	4.54202
1	2.60268
2.30271	6.52812
1.7411	3.57184

## Sheet: figure 5C
pLC5-vector	pLC5-circ-ATXN2
0.473029	44.0173
0.582367	86.2229
1	41.0696
1.28343	46.8507
4.08405	30.4844
0.63728	45.8866

## Sheet: figure 5D
	VECTOR-GFP				circ-ATNX2-GFP
hours	Y (A3)	Y (B3)	Y (C3)	Y (D3)	Y (A3)	Y (B3)	Y (C3)	Y (D3)
0	0	0	0	0	0	0	0	0
0.700556	0.0554	0.0985	0.0922	0.0974	0.0529	0.0836	0.0818	0.099
1.20083	0.1465	0.1917	0.1676	0.1779	0.1197	0.16	0.1346	0.1728
1.70139	0.2182	0.2816	0.2488	0.2734	0.196	0.2388	0.1937	0.2445
2.20194	0.2799	0.3268	0.2904	0.3256	0.2451	0.2863	0.2518	0.2876
2.7025	0.3185	0.3777	0.3554	0.3767	0.2907	0.3355	0.2772	0.3273
3.20278	0.3554	0.418	0.385	0.4283	0.3341	0.3871	0.3134	0.3786
3.70306	0.3951	0.4686	0.4297	0.4578	0.3605	0.4173	0.3369	0.4001
4.20389	0.4243	0.5057	0.4577	0.4935	0.4022	0.4557	0.3723	0.435
4.70417	0.4568	0.5419	0.4984	0.5093	0.4334	0.4968	0.401	0.4553
5.20472	0.482	0.57	0.5099	0.5474	0.4699	0.5308	0.4129	0.4841
5.70528	0.5059	0.603	0.5387	0.5618	0.4958	0.5483	0.4465	0.5113
6.20528	0.525	0.6197	0.5637	0.5879	0.5218	0.5754	0.4528	0.5442
6.70583	0.5367	0.6285	0.5764	0.6039	0.5376	0.5981	0.4735	0.5518
7.20639	0.5592	0.6486	0.5965	0.616	0.56	0.623	0.4936	0.5655
7.70667	0.5855	0.6538	0.6172	0.6346	0.5876	0.6512	0.5006	0.5871
8.20694	0.5966	0.6673	0.6386	0.6645	0.6019	0.6769	0.5218	0.5993
8.7075	0.6118	0.6811	0.6432	0.6707	0.6306	0.696	0.5377	0.6136
9.2075	0.6321	0.6935	0.6592	0.6862	0.6594	0.7119	0.5417	0.628
9.70778	0.6401	0.6983	0.6817	0.7044	0.672	0.7289	0.556	0.6536
10.2081	0.6572	0.7167	0.6902	0.7111	0.6998	0.7517	0.5689	0.6651
10.7081	0.6636	0.72	0.7195	0.7374	0.7141	0.7629	0.5757	0.6849
11.2083	0.6834	0.743	0.7245	0.7458	0.7401	0.7817	0.5854	0.6895
11.7086	0.6954	0.7425	0.7412	0.7658	0.7526	0.798	0.6024	0.7023
12.2089	0.7012	0.7687	0.7602	0.7807	0.7719	0.8113	0.6125	0.7168
12.7092	0.7132	0.779	0.7715	0.8034	0.7954	0.8214	0.6219	0.7331
13.2097	0.7276	0.7914	0.7794	0.8089	0.8194	0.8337	0.6307	0.74
13.7097	0.7366	0.8024	0.7932	0.8205	0.8357	0.8512	0.6399	0.7547
14.46	0.7561	0.8203	0.8072	0.848	0.8616	0.8838	0.66	0.7716
14.9603	0.7623	0.8464	0.8209	0.8617	0.8808	0.8953	0.6746	0.7821
15.4606	0.7608	0.851	0.8256	0.886	0.8985	0.9081	0.6804	0.7879
15.9608	0.7739	0.8703	0.8472	0.8964	0.9172	0.9231	0.6929	0.8112
16.4611	0.7836	0.8906	0.8596	0.9098	0.9424	0.9284	0.7088	0.822
16.9614	0.7998	0.908	0.8665	0.9307	0.9595	0.9436	0.7168	0.8309
17.4614	0.8219	0.9238	0.8842	0.936	0.9808	0.9613	0.7264	0.8358
17.9617	0.8385	0.9349	0.9016	0.9523	0.9891	0.9611	0.7374	0.8496
18.4617	0.8523	0.9499	0.9172	0.9688	1.0019	0.9818	0.7618	0.8618
18.9622	0.8718	0.9726	0.9206	0.9801	1.0284	0.9908	0.7659	0.87
19.4625	0.8822	0.9843	0.9399	0.9912	1.0399	1.0006	0.7799	0.87
19.9625	0.896	1.0094	0.9533	1.0023	1.0565	1.0122	0.7906	0.8841
20.4628	0.9143	1.0264	0.9645	1.0188	1.0762	1.0381	0.7997	0.8942
20.9633	0.9338	1.0474	0.9929	1.0254	1.0929	1.0482	0.8124	0.9062
21.4633	0.9407	1.066	1.0062	1.0387	1.1125	1.0521	0.8282	0.9284
21.9636	0.9562	1.0714	1.0189	1.0669	1.1287	1.0627	0.8184	0.925
22.4642	0.9795	1.0975	1.0348	1.0643	1.1482	1.0817	0.8463	0.9349
22.9642	0.9836	1.1136	1.0428	1.0988	1.1636	1.0818	0.8538	0.9467
23.4644	0.9994	1.1286	1.0564	1.1276	1.1744	1.0916	0.8712	0.9569
23.9647	1.008	1.1545	1.076	1.1443	1.1887	1.1034	0.8797	0.9626
24.4647	1.0246	1.1716	1.0964	1.1471	1.2033	1.1293	0.8887	0.9769
24.965	1.0383	1.1908	1.1048	1.1651	1.2177	1.133	0.8999	0.9978
25.465	1.0569	1.2213	1.1311	1.1944	1.2347	1.1549	0.9156	1.0076
25.9653	1.0602	1.2365	1.146	1.2009	1.2508	1.1684	0.9366	1.0197
26.4656	1.0859	1.2639	1.1561	1.2257	1.2718	1.1827	0.9446	1.0228
26.9656	1.1073	1.276	1.1798	1.2489	1.2844	1.1873	0.9621	1.0329
27.4658	1.1266	1.2933	1.177	1.2658	1.3076	1.2038	0.9716	1.0295
27.9664	1.1369	1.3113	1.1894	1.2818	1.3078	1.2065	0.978	1.0388
28.4667	1.1569	1.329	1.2154	1.2801	1.3218	1.2198	0.9889	1.0507
28.9669	1.1706	1.3617	1.2227	1.3029	1.3369	1.2291	0.9907	1.0565
29.4669	1.1903	1.3959	1.256	1.3028	1.3547	1.2419	1.0018	1.0714
29.9669	1.195	1.4108	1.272	1.3245	1.3739	1.2497	1.0064	1.0914
30.4675	1.2237	1.4399	1.294	1.3525	1.3905	1.2623	1.0149	1.0903
30.9681	1.2455	1.4717	1.3187	1.3773	1.4078	1.2647	1.0253	1.1095
31.4686	1.2617	1.489	1.3419	1.3937	1.4241	1.2643	1.0357	1.1213
32.2189	1.2899	1.5062	1.3771	1.4143	1.4441	1.2863	1.0563	1.1325
32.7192	1.3152	1.5329	1.3859	1.4382	1.4603	1.2902	1.067	1.1461
33.2197	1.3253	1.5587	1.3897	1.4457	1.4866	1.3113	1.0767	1.1504
33.7203	1.3447	1.5776	1.4216	1.458	1.5128	1.3306	1.0939	1.1599
34.2206	1.3727	1.595	1.4419	1.4867	1.5292	1.3456	1.1151	1.1719
34.7206	1.3986	1.6125	1.4377	1.4988	1.5593	1.3736	1.1269	1.1735
35.2208	1.408	1.6348	1.4436	1.5124	1.5842	1.3759	1.134	1.1892
35.7211	1.4143	1.6653	1.4751	1.5325	1.6078	1.3735	1.1366	1.1997
36.2211	1.428	1.6892	1.4912	1.5633	1.6111	1.3867	1.1453	1.2124
36.7211	1.442	1.7183	1.527	1.5969	1.633	1.3978	1.1537	1.2239
37.2217	1.4557	1.7359	1.546	1.6235	1.6505	1.4059	1.163	1.2314
37.7219	1.4694	1.7624	1.5916	1.642	1.653	1.4138	1.174	1.2455
38.2219	1.4889	1.8004	1.6071	1.6542	1.6591	1.4305	1.1919	1.2606
38.7222	1.5	1.8238	1.6367	1.6775	1.6834	1.4381	1.2012	1.2682
39.2228	1.5283	1.84	1.6473	1.6976	1.6829	1.4615	1.2204	1.2761
39.7228	1.5544	1.8559	1.6776	1.7099	1.6959	1.4734	1.2393	1.2889
40.2233	1.5803	1.8688	1.7048	1.7392	1.718	1.4896	1.242	1.3055
40.7236	1.608	1.8874	1.7172	1.7604	1.7391	1.5124	1.2653	1.319
41.2242	1.6283	1.9121	1.7458	1.7976	1.7575	1.5239	1.2801	1.3344
41.7244	1.6346	1.939	1.7662	1.835	1.7743	1.5348	1.2876	1.3512
42.225	1.6537	1.9558	1.7972	1.865	1.7989	1.5514	1.2977	1.3624
42.7253	1.6831	1.9672	1.8224	1.8945	1.8307	1.5702	1.3025	1.3682
43.2258	1.7005	1.9868	1.8535	1.9079	1.8441	1.5808	1.3175	1.3967
43.7258	1.7235	2.0138	1.8874	1.9366	1.8667	1.5889	1.3319	1.393
44.2258	1.7517	2.0365	1.9086	1.9837	1.8782	1.6032	1.3545	1.4004
44.7261	1.7724	2.0682	1.9339	2.0206	1.9018	1.6224	1.3762	1.4107
45.2264	1.7956	2.1063	1.9553	2.0408	1.918	1.6397	1.3817	1.4158
45.7267	1.8226	2.1238	1.9777	2.0627	1.9213	1.6714	1.3996	1.4268
46.2267	1.8411	2.1558	1.9818	2.0626	1.9258	1.6799	1.4281	1.4351
46.7267	1.8556	2.1986	2.0066	2.1034	1.9551	1.691	1.4344	1.4509
47.2267	1.8781	2.2197	2.037	2.1279	1.977	1.6983	1.4491	1.4796
47.7269	1.9028	2.2437	2.08	2.1389	2.0068	1.7226	1.4739	1.4799
48.2275	1.9234	2.2708	2.1083	2.1581	2.0254	1.7241	1.4844	1.5007
48.7278	1.9536	2.3229	2.1453	2.2113	2.0437	1.7348	1.4926	1.5151
49.4781	1.9961	2.3767	2.1808	2.2431	2.055	1.7576	1.5047	1.532
49.9783	2.0046	2.4107	2.204	2.2846	2.086	1.7824	1.5107	1.5404
50.4786	2.0259	2.4352	2.2422	2.3049	2.0821	1.8002	1.5297	1.5541
50.9792	2.057	2.4764	2.2641	2.3211	2.1046	1.8215	1.5631	1.5545
51.4797	2.0892	2.51	2.3063	2.3385	2.1287	1.8277	1.5677	1.5714
51.9797	2.1129	2.5482	2.3434	2.3613	2.1577	1.8518	1.5862	1.584
52.48	2.1399	2.5872	2.3859	2.4181	2.1808	1.8599	1.5943	1.5877
52.9806	2.1656	2.6299	2.3972	2.4644	2.1999	1.892	1.6241	1.5981
53.4811	2.1951	2.6805	2.4411	2.5092	2.2311	1.9007	1.6287	1.6224
53.9817	2.2262	2.7029	2.4858	2.5344	2.2452	1.9199	1.639	1.6263
54.4819	2.2434	2.7056	2.5234	2.5685	2.2652	1.9391	1.6498	1.6266
54.9822	2.2743	2.7595	2.5574	2.588	2.2821	1.9547	1.6573	1.633
55.4822	2.2948	2.7778	2.5666	2.6148	2.3142	1.9759	1.6707	1.6376
55.9825	2.3275	2.7854	2.5955	2.6417	2.3175	1.9922	1.6931	1.6684
56.4828	2.3618	2.815	2.6083	2.6775	2.3573	2.0188	1.7161	1.6717
56.9833	2.3855	2.8574	2.6676	2.6909	2.3817	2.0314	1.7305	1.6743
57.4839	2.4113	2.873	2.7069	2.7227	2.3936	2.0334	1.7473	1.6805
57.9844	2.4387	2.8934	2.7386	2.761	2.3938	2.0356	1.7652	1.6846
58.4847	2.4785	2.9402	2.7709	2.7977	2.4217	2.0525	1.7839	1.7055
58.985	2.5203	2.9907	2.7952	2.7943	2.4277	2.0729	1.8147	1.7155
59.485	2.5345	3.0336	2.8139	2.8398	2.4597	2.0983	1.8189	1.7233
59.9853	2.5573	3.0881	2.8476	2.8761	2.4745	2.1233	1.8349	1.7479
60.4856	2.5977	3.1166	2.8698	2.9108	2.4796	2.1415	1.8584	1.7579
60.9856	2.6271	3.1396	2.9184	2.9492	2.4981	2.1519	1.8881	1.7619
61.4858	2.6629	3.2046	2.9438	2.9867	2.5246	2.1677	1.8996	1.7665
61.9864	2.6846	3.248	2.9601	3.0158	2.5575	2.1655	1.8995	1.7887
62.4867	2.6899	3.2471	2.993	3.0381	2.5691	2.1876	1.9211	1.7972
62.9869	2.7409	3.2813	3.0391	3.0397	2.5681	2.2078	1.9478	1.8004
63.4875	2.7752	3.3016	3.0593	3.0795	2.5783	2.2332	1.9633	1.8198
63.9881	2.7991	3.3264	3.0953	3.1395	2.5907	2.247	1.9712	1.8417
64.4886	2.83	3.3813	3.1245	3.1383	2.6223	2.2601	1.9855	1.8309
64.9889	2.8614	3.4128	3.1652	3.1586	2.6525	2.2814	2.0009	1.8465
65.4892	2.8983	3.449	3.2019	3.1907	2.6824	2.2648	2.0104	1.8425
65.9894	2.9228	3.4927	3.2263	3.217	2.6995	2.2635	2.0201	1.8695
66.49	2.9614	3.5389	3.2679	3.2339	2.7153	2.2758	2.0313	1.8853
67.2406	2.9943	3.5824	3.3047	3.2613	2.7542	2.2904	2.0263	1.8866
67.7411	3.0185	3.6157	3.3448	3.2761	2.7942	2.3173	2.0348	1.8943
68.2417	3.0352	3.6569	3.3419	3.3153	2.7989	2.3334	2.0473	1.8924
68.7419	3.0607	3.6615	3.3902	3.3404	2.8	2.3589	2.0794	1.907
69.2422	3.0958	3.6841	3.4046	3.3589	2.8082	2.3319	2.0867	1.9223
69.7425	3.1173	3.7195	3.4364	3.3554	2.8179	2.3717	2.1016	1.9327
70.2431	3.1373	3.7411	3.4415	3.3756	2.8196	2.3756	2.0956	1.9369
70.7436	3.1607	3.762	3.4359	3.3953	2.837	2.3851	2.1016	1.937
71.2439	3.1917	3.7782	3.4628	3.408	2.8547	2.391	2.1038	1.9221
71.7442	3.1978	3.8325	3.4993	3.4092	2.8878	2.4109	2.1191	1.915
72.2444	3.2162	3.8485	3.5047	3.429	2.8979	2.422	2.1324	1.9337

## Sheet: figure 5G
vector	circ-ATXN2
13.7	7.66
13.8	7.46
13.3	7.16

## Sheet: figure 5I
vector	circ-ATXN2
12.5	6.8
13	6.4
13.2	7.2

## Sheet: figure 5K
	G2/M			S			G0
vector	14.98	14.68	12.59	20.72	25.96	25.88	64.31	59.07	61.47
circ-ATXN2	10.42	9.29	7.63	23.19	31.43	32.54	66.39	59.3	59.84

## Sheet: figure 5E
	VECTOR-GFP				circ-ATNX2-GFP
24	1.0246	1.1716	1.0964	1.1471	1.2033	1.1293	0.8887	0.9769
48	1.9234	2.2708	2.1083	2.1581	2.0254	1.7241	1.4844	1.5007
72	3.2162	3.8485	3.5047	3.429	2.8979	2.422	2.1324	1.9337
